# Supplementary material for: {[VIV14VV4O42(H2O)][Ni(C4N3H13)(C4N3H14)]4(H2O)6}4+: a novel nanosized calix-type polyoxovanadate cation
Source: Royal Society of Chemistry journal article supplement (doi:10.1039/c0ce00722f), 2011-01-01
Supplement: c0ce00722f.pdf [file c0ce00722f.pdf]

## Supplementary Information

### $\{[V^{IV}_{14}V^V_4O_{42}(H_2O)][Ni(C_4N_3H_{13})(C_4N_3H_{14})]_4(H_2O)_6\}^{4+}$ : A novel nanosized calix-type polyoxovanadate cation

Zhibin Zhang,<sup>a</sup> Yan Xu,<sup>\*a</sup> Lei Zheng,<sup>a</sup> Dunru Zhu<sup>a</sup> and You Song<sup>b</sup>

<sup>a</sup> College of Chemistry and Chemical Engineering, State Key Laboratory of Materials-oriented Chemical Engineering, Nanjing University of Technology, Nanjing 210009, P. R. China.

<sup>b</sup> Coordination Chemistry Institute, State Key Laboratory of Coordination Chemistry, Nanjing University, Nanjing 210093, P. R. China.

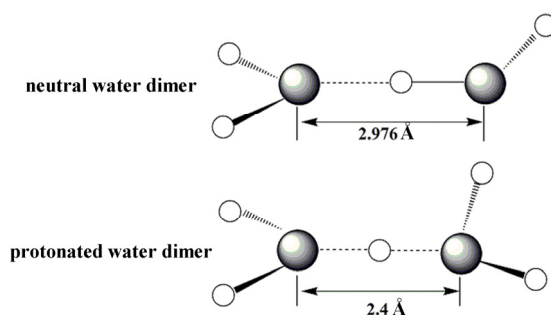

Fig. S1 Depiction of a theoretically predicted neutral and protonated water dimer.

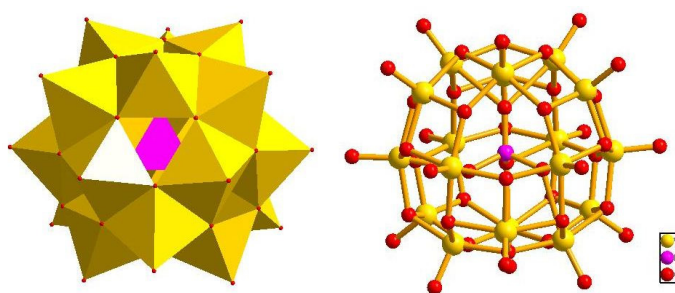

Fig. S2 Representative view of hexa-capped Keggin structural anion (Section B of **1**). (Colour code: V, gold; O, red; P, pink).

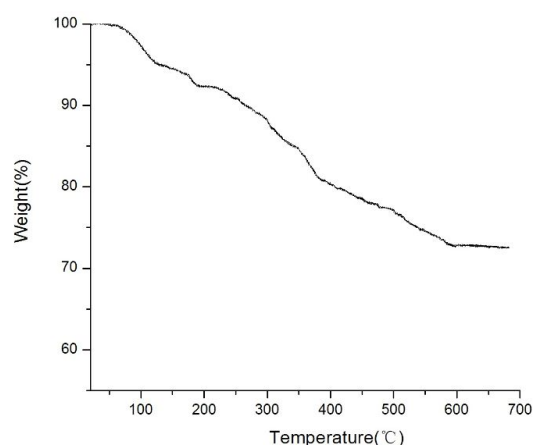

TG analysis: The weight loss of 2.55 % from 40 to 100°C are assigned to the removal of the six crystal water molecules (calculation value: 2.50 %). The weight loss of 25.09% from 100 to 610°C are attributable to the decomposition of the DETA molecule and one water molecule in the cluster (calculation value: 25.89 %) The total weight loss (27.64%) is in good agreement with the calculated value (28.39%).

**Fig. S3** The TG curve of compound **1**.

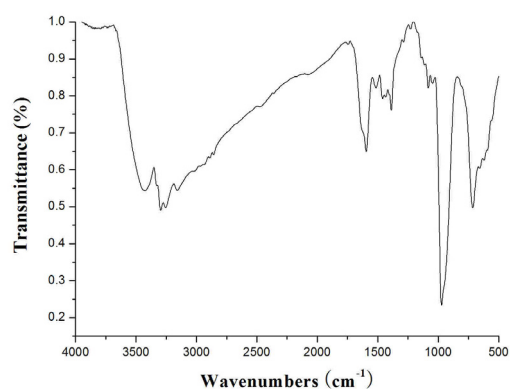

IR spectrum: 3425 $\text{cm}^{-1}$ ,  $\nu(\text{O-H})$ ; 3296 $\text{cm}^{-1}$ , 3254  $\text{cm}^{-1}$ , 3158  $\text{cm}^{-1}$ ,  $\nu(\text{N-H})$ ; 1595  $\text{cm}^{-1}$ , 1388  $\text{cm}^{-1}$ ,  $\nu(\text{C-C})$ ,  $\nu(\text{C-N})$ ; 1082  $\text{cm}^{-1}$ ,  $\nu(\text{P-O})$ ; 972  $\text{cm}^{-1}$ ,  $\nu(\text{V=O})$ ; 714  $\text{cm}^{-1}$ ,  $\nu(\text{V-O-V})$ .

**Fig. S4** IR spectra of compound **1**.

**Table S1** Bond valence sum for compound **1**.

|         |      |          |      |
|---------|------|----------|------|
| V1 (×4) | 3.83 | V7 (×4)  | 4.38 |
| V2 (×1) | 4.42 | V8 (×2)  | 4.46 |
| V3 (×1) | 4.73 | V9 (×4)  | 4.30 |
| V4 (×4) | 4.17 | V10 (×4) | 4.31 |
| V5 (×4) | 4.76 | V11 (×4) | 4.25 |
| V6 (×4) | 4.17 |          |      |

**Table S2** Selected hydrogen bond lengths (Å) and angles (°).

|                             |      |         |           |     |
|-----------------------------|------|---------|-----------|-----|
| N1—H1C...O9                 | 0.91 | 2.52    | 3.263(5)  | 140 |
| N1—H1C...O1 <sup>a</sup>    | 0.91 | 2.32    | 3.095(5)  | 142 |
| N2—H2C...O3 <sup>b</sup>    | 0.90 | 2.08    | 2.978(5)  | 173 |
| N2—H2D...O7                 | 0.90 | 2.11    | 2.991(5)  | 166 |
| N6A—H6AA...O24 <sup>c</sup> | 0.89 | 2.03    | 2.884(11) | 161 |
| N3—H3C...O14 <sup>d</sup>   | 0.91 | 2.53    | 3.259(6)  | 137 |
| N4—H4C...O23 <sup>d</sup>   | 0.90 | 2.15    | 2.976(5)  | 151 |
| N4—H4D...O4W <sup>a</sup>   | 0.90 | 2.43    | 3.224(7)  | 147 |
| N6A—H6AC...O19 <sup>d</sup> | 0.89 | 1.91    | 2.794(11) | 174 |
| N5—H5D...O14 <sup>d</sup>   | 0.90 | 2.48    | 3.265(5)  | 146 |
| N6—H6C...24 <sup>c</sup>    | 0.89 | 1.97    | 2.832(13) | 163 |
| N6—H6D...O13 <sup>d</sup>   | 0.89 | 2.22    | 2.789(12) | 122 |
| N6—H6D...O19 <sup>d</sup>   | 0.89 | 2.19    | 2.924(14) | 140 |
| N8—H8C...O17 <sup>e</sup>   | 0.90 | 2.12    | 3.009(8)  | 167 |
| N8—H8D...O18 <sup>e</sup>   | 0.90 | 2.34    | 2.742(7)  | 107 |
| O2W—H2WB...O12              | 0.81 | 2.55(1) | 3.092(9)  | 126 |
| N9—H9D...O11                | 0.89 | 2.41    | 2.799(11) | 107 |
| N9—H9E...O13 <sup>f</sup>   | 0.89 | 2.57    | 3.259(12) | 135 |
| O3W—H3WB...O13 <sup>g</sup> | 0.80 | 2.57(1) | 2.940(6)  | 111 |
| O3W—H3WB...O21 <sup>g</sup> | 0.80 | 2.10(1) | 2.621(5)  | 123 |

Symmetry transformations used to generate equivalent atoms for **1**: <sup>a</sup>  $y, 1/2-x, z$ ; <sup>b</sup>  $1-y, -1/2+x, 1-z$ ; <sup>c</sup>  $x, -1+y, z$ ; <sup>d</sup>  $1-x, 1-y, -z$ ; <sup>e</sup>  $x, y, 1+z$ ; <sup>f</sup>  $-1/2+y, 1-x, 1-z$ ; <sup>g</sup>  $-1/2+y, 1-x, -z$ .
